# Supplementary material for: Efficient gene delivery with paclitaxel-loaded DNA-hybrid polyplexes based on cationic polyhedral oligomeric silsesquioxanes
Source: Royal Society of Chemistry journal article supplement (doi:10.1039/c0jm01461c), 2010-01-01

## **Efficient Gene Delivery with Paclitaxel-loaded DNA-Hybrid Polyplexes Based on Cationic Polyhedral Oligomeric Silsesquioxanes**

*Xian Jun Loh, \*<sup>a</sup> Zhong-Xing Zhang,<sup>a</sup> Khine Yi Mya,<sup>a</sup> Yun-long Wu,<sup>b</sup> Chao Bin He<sup>a</sup> and Jun Li<sup>\*ab</sup>*

<sup>a</sup>Institute of Materials Research and Engineering (IMRE), A\*STAR (Agency for Science, Technology and Research), 3 Research Link, Singapore 117602 (Singapore). E-mail: XianJun\_Loh@scholars.a-star.edu.sg / bielj@nus.edu.sg

<sup>b</sup>Division of Bioengineering, Faculty of Engineering, National University of Singapore (NUS), 7 Engineering Drive 1, Singapore 117574 (Singapore)

**Fig. S1.** Cell viability assay in MDA-MB-231 cell line. The cells were treated with various concentrations of DNA/polymer (at N/P ratio of 5) complexes. The polymers tested were POSS-g-PDMAEMA polymer, POSS-g-PDMAEMA-PTX micelle, P(DMAEMA) homopolymer and PEI (25K). Polymers were incubated for 24 h in a serum-containing medium. Cell viability was determined by the MTT assay and expressed as a percentage of control (untreated cell cultures).

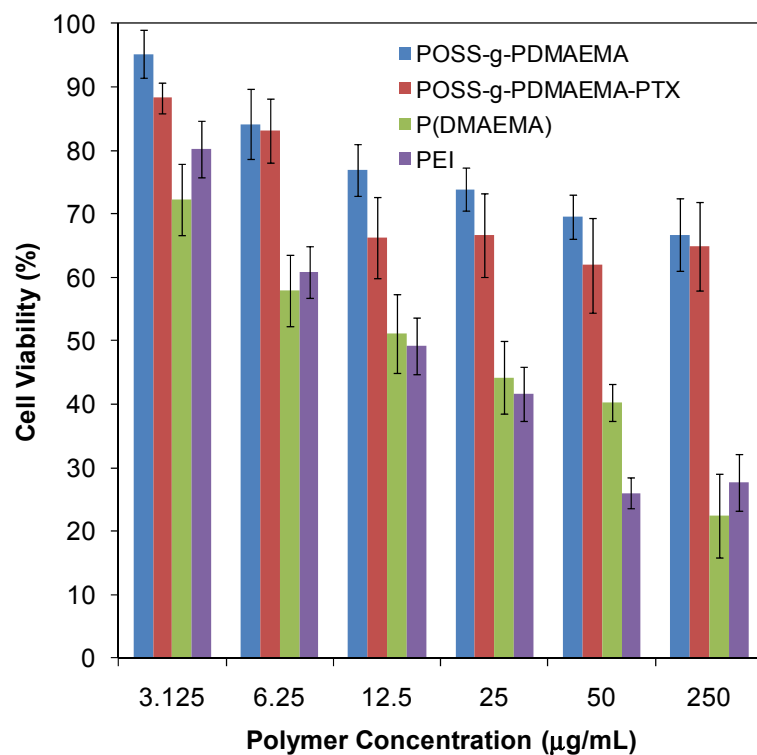

Supplement: c0jm01461c.pdf [file c0jm01461c.pdf]
